# Supplementary material for: Ionic liquids through the looking glass: theory mirrors experiment and provides further insight into aromatic substitution processes
Source: Royal Society of Chemistry journal article supplement (doi:10.1039/b919831h), 2009-12-18
Supplement: b919831h.pdf [file b919831h.pdf]

## Electronic supporting information for

“Ionic liquids through the looking glass: theory mirrors experiment and provides further insight in aromatic substitution processes”

Shon Glyn Jones,<sup>a</sup> Hon Man Yau,<sup>b</sup> Erika Davies,<sup>b</sup> James M. Hook,<sup>c</sup> Tristan G. A. Youngs,<sup>d</sup> Jason B. Harper<sup>b,\*</sup> and Anna K. Croft<sup>a,\*</sup>

<sup>a</sup>School of Chemistry, University of Wales, Bangor, Gwynedd, LL57 2UW, United Kingdom.

<sup>b</sup>School of Chemistry, University of New South Wales, Sydney, NSW, 2052, Australia.

<sup>c</sup>Analytical Centre, University of New South Wales, Sydney, NSW, 2052, Australia.

<sup>d</sup>Atomistic Simulation Centre, School of Mathematics and Physics, Queen's University Belfast, BT7 1NN, United Kingdom.

### Experimental – Sample preparation

#### Preparation of the reaction mixtures for the S<sub>N</sub>Ar reaction of 2,4-dinitrofluorobenzene

For the solvolysis reactions of 2,4-dinitrofluorobenzene carried out in ethanol where ethanol is the nucleophile, a solution containing triethylamine (2.18 g, 21.5 mmol) and acetonitrile-*d*<sub>3</sub> (3.11 g, 7.06 mmol) was mixed with ethanol (14.5 g, 315 mmol, 12.6 M) in a 25 mL volumetric flask and used as the reaction mixture.

Where [BMIM][N(SO<sub>2</sub>CF<sub>3</sub>)<sub>2</sub>] was the reaction medium, the reaction mixture was prepared by mixing triethylamine (395 mg, 3.90 mmol) and ethanol (944 mg, 20.5 mmol, 2.05 M) with [BMIM][N(SO<sub>2</sub>CF<sub>3</sub>)<sub>2</sub>] (11.9 g, 28.37 mmol) in a 10 mL volumetric flask.

#### Eyring plot showing the data from which activation parameters shown in Table 2 are derived

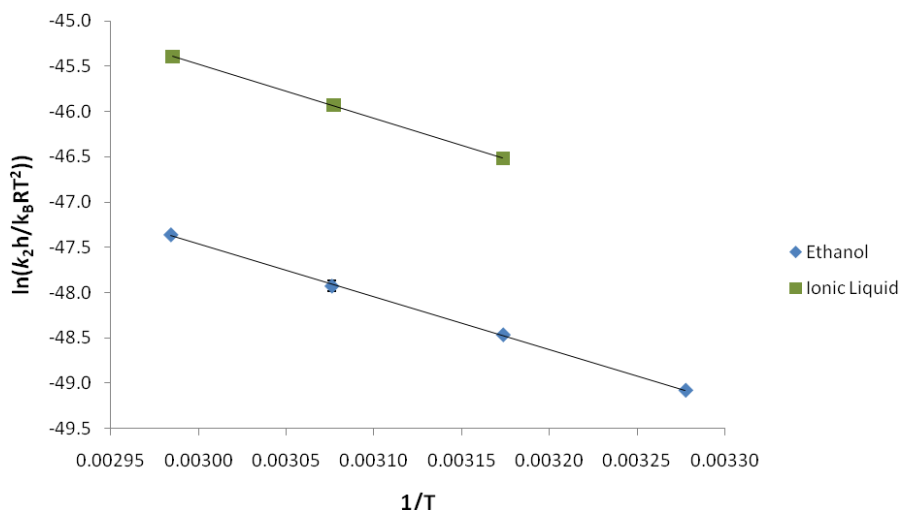

The temperature-dependent kinetic data shown in Table 1 were fitted to the Eyring equation for the S<sub>N</sub>Ar reaction of 2,4-dinitrofluorobenzene shown in Scheme 1. Each of the data points is the average of three kinetic experiments and the errors are reported as the standard deviation of the mean. The enthalpies ( $\Delta H^\ddagger$ ) and entropies of activation ( $\Delta S^\ddagger$ ) for the reaction were derived from the slope and intercept of the curves.

**RESP charges and OPLS force field parameters**

1-fluoro-2,4-dinitrobenzene

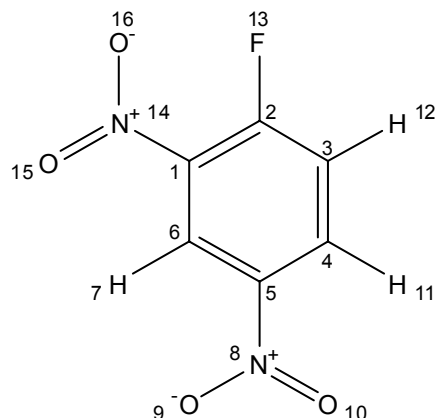

| Atom | Element | RESP    | Type | $\epsilon$ / kcal.mol <sup>-1</sup> | $\sigma$ / Å |
|------|---------|---------|------|-------------------------------------|--------------|
| 1    | C       | -0.0269 | CA   | 0.070                               | 3.550        |
| 2    | C       | 0.3938  | CA   | 0.070                               | 3.550        |
| 3    | C       | -0.3075 | CA   | 0.070                               | 3.550        |
| 4    | C       | -0.1253 | CA   | 0.070                               | 3.550        |
| 5    | C       | 0.0554  | CA   | 0.070                               | 3.550        |
| 6    | C       | -0.2392 | CA   | 0.070                               | 3.550        |
| 7    | H       | 0.2577  | HA   | 0.030                               | 2.420        |
| 8    | N       | 0.7709  | NO   | 0.120                               | 3.250        |
| 9    | O       | -0.4503 | ON   | 0.170                               | 2.960        |
| 10   | O       | -0.4694 | ON   | 0.170                               | 2.960        |
| 11   | H       | 0.2230  | HA   | 0.030                               | 2.420        |
| 12   | H       | 0.2218  | HA   | 0.030                               | 2.420        |
| 13   | F       | -0.1849 | F    | 0.061                               | 2.850        |
| 14   | N       | 0.7748  | NO   | 0.120                               | 3.250        |
| 15   | O       | -0.4587 | ON   | 0.170                               | 2.960        |
| 16   | O       | -0.4353 | ON   | 0.170                               | 2.960        |

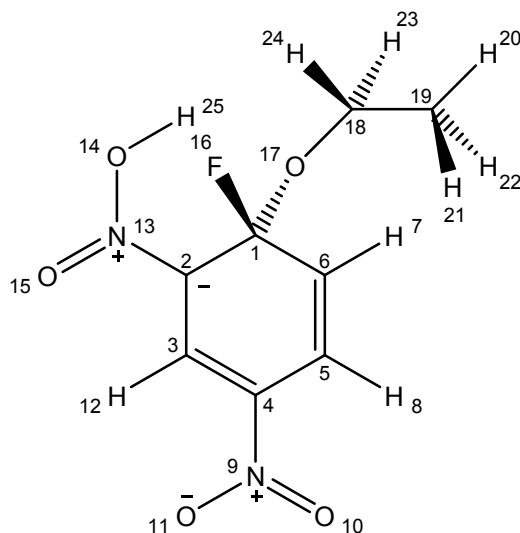

| Atom | Element | RESP    | Type | $\epsilon / \text{kcal.mol}^{-1}$ | $\sigma / \text{\AA}$ |
|------|---------|---------|------|-----------------------------------|-----------------------|
| 1    | C       | 0.9708  | CT   | 0.066                             | 3.500                 |
| 2    | C       | -0.2329 | CM   | 0.076                             | 3.550                 |
| 3    | C       | -0.1445 | CM   | 0.076                             | 3.550                 |
| 4    | C       | 0.0769  | CM   | 0.076                             | 3.550                 |
| 5    | C       | -0.1900 | CM   | 0.076                             | 3.550                 |
| 6    | C       | -0.4242 | CM   | 0.076                             | 3.550                 |
| 7    | H       | 0.2206  | HC   | 0.030                             | 2.420                 |
| 8    | H       | 0.2141  | HC   | 0.030                             | 2.420                 |
| 9    | N       | 0.7197  | NO   | 0.120                             | 3.250                 |
| 10   | O       | -0.4601 | ON   | 0.170                             | 2.960                 |
| 11   | O       | -0.4704 | ON   | 0.170                             | 2.960                 |
| 12   | H       | 0.2184  | HC   | 0.030                             | 2.420                 |
| 13   | N       | 0.6053  | NO   | 0.120                             | 3.250                 |
| 14   | O       | -0.5020 | OH   | 0.170                             | 3.000                 |
| 15   | O       | -0.3831 | ON   | 0.170                             | 2.960                 |
| 16   | F       | -0.3881 | F    | 0.053                             | 2.950                 |
| 17   | O       | -0.6836 | OS   | 0.140                             | 2.900                 |
| 18   | C       | 0.3686  | CT   | 0.066                             | 3.500                 |
| 19   | C       | -0.2904 | CT   | 0.066                             | 3.500                 |
| 20   | H       | 0.0715  | HC   | 0.030                             | 2.500                 |
| 21   | H       | 0.0775  | HC   | 0.030                             | 2.500                 |
| 22   | H       | 0.1073  | HC   | 0.030                             | 2.500                 |
| 23   | H       | 0.0329  | HC   | 0.030                             | 2.500                 |
| 24   | H       | -0.0025 | HC   | 0.030                             | 2.500                 |
| 25   | H       | 0.4882  | HO   | 0                                 | 0                     |

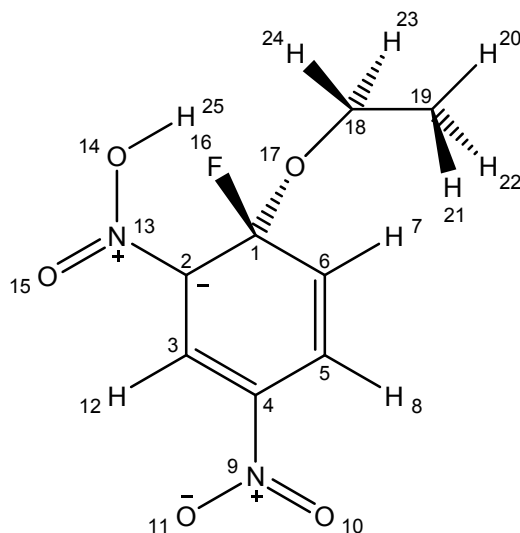

| Atom | Element | RESP    | Type | $\epsilon$ / kcal.mol <sup>-1</sup> | $\sigma$ / Å |
|------|---------|---------|------|-------------------------------------|--------------|
| 1    | C       | 0.9708  | CT   | 0.066                               | 3.500        |
| 2    | C       | -0.2329 | CA   | 0.070                               | 3.550        |
| 3    | C       | -0.1445 | CA   | 0.070                               | 3.550        |
| 4    | C       | 0.0769  | CA   | 0.070                               | 3.550        |
| 5    | C       | -0.1900 | CA   | 0.070                               | 3.550        |
| 6    | C       | -0.4242 | CA   | 0.070                               | 3.550        |
| 7    | H       | 0.2206  | HA   | 0.030                               | 2.420        |
| 8    | H       | 0.2141  | HA   | 0.030                               | 2.420        |
| 9    | N       | 0.7197  | NO   | 0.120                               | 3.250        |
| 10   | O       | -0.4601 | ON   | 0.170                               | 2.960        |
| 11   | O       | -0.4704 | ON   | 0.170                               | 2.960        |
| 12   | H       | 0.2184  | HA   | 0.030                               | 2.420        |
| 13   | N       | 0.6053  | NO   | 0.120                               | 3.250        |
| 14   | O       | -0.5020 | OH   | 0.170                               | 3.000        |
| 15   | O       | -0.3831 | ON   | 0.170                               | 2.960        |
| 16   | F       | -0.3881 | F    | 0.053                               | 2.950        |
| 17   | O       | -0.6836 | OS   | 0.140                               | 2.900        |
| 18   | C       | 0.3686  | CT   | 0.066                               | 3.500        |
| 19   | C       | -0.2904 | CT   | 0.066                               | 3.500        |
| 20   | H       | 0.0715  | HC   | 0.030                               | 2.500        |
| 21   | H       | 0.0775  | HC   | 0.030                               | 2.500        |
| 22   | H       | 0.1073  | HC   | 0.030                               | 2.500        |
| 23   | H       | 0.0329  | HC   | 0.030                               | 2.500        |
| 24   | H       | -0.0025 | HC   | 0.030                               | 2.500        |
| 25   | H       | 0.4882  | HO   | 0                                   | 0            |

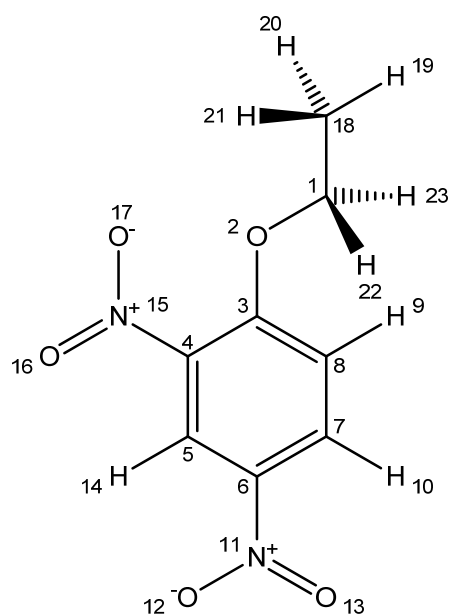

| Atom | Element | RESP    | Type | $\epsilon / \text{kcal.mol}^{-1}$ | $\sigma / \text{\AA}$ |
|------|---------|---------|------|-----------------------------------|-----------------------|
| 1    | C       | 0.2940  | CT   | 0.066                             | 3.500                 |
| 2    | O       | -0.2972 | OS   | 0.140                             | 2.900                 |
| 3    | C       | 0.3312  | CA   | 0.070                             | 3.550                 |
| 4    | C       | -0.1050 | CA   | 0.070                             | 3.550                 |
| 5    | C       | -0.1803 | CA   | 0.070                             | 3.550                 |
| 6    | C       | 0.0360  | CA   | 0.070                             | 3.550                 |
| 7    | C       | -0.1579 | CA   | 0.070                             | 3.550                 |
| 8    | C       | -0.2512 | CA   | 0.070                             | 3.550                 |
| 9    | H       | 0.1496  | HA   | 0.030                             | 2.420                 |
| 10   | H       | 0.2257  | HA   | 0.030                             | 2.420                 |
| 11   | N       | 0.7633  | NO   | 0.120                             | 3.250                 |
| 12   | O       | -0.4690 | ON   | 0.170                             | 2.960                 |
| 13   | O       | -0.4690 | ON   | 0.170                             | 2.960                 |
| 14   | H       | 0.2451  | HA   | 0.030                             | 2.420                 |
| 15   | N       | 0.8015  | NO   | 0.120                             | 3.250                 |
| 16   | O       | -0.4657 | ON   | 0.170                             | 2.960                 |
| 17   | O       | -0.4657 | ON   | 0.170                             | 2.960                 |
| 18   | C       | -0.4395 | CT   | 0.066                             | 3.500                 |
| 19   | H       | 0.1318  | HC   | 0.030                             | 2.500                 |
| 20   | H       | 0.1318  | HC   | 0.030                             | 2.500                 |
| 21   | H       | 0.1318  | HC   | 0.030                             | 2.500                 |
| 22   | H       | 0.0278  | HC   | 0.030                             | 2.500                 |
| 23   | H       | 0.0316  | HC   | 0.030                             | 2.500                 |

**Equilibrated box sizes for simulations (single side dimension of cube)**

|          | Starting material |      | Intermediate |      | Product |      |
|----------|-------------------|------|--------------|------|---------|------|
| Solvent  | EtOH              | IL   | EtOH         | IL   | EtOH    | IL   |
| Size (Å) | 27.4              | 45.9 | 30.5         | 46.0 | 29.7    | 45.9 |

**Selected radial distribution functions for 1-fluoro-2,4-dinitrobenzene in the ionic liquid 1-butyl-3-methylimidazolium bis(trifluoromethanesulfonyl)amide**

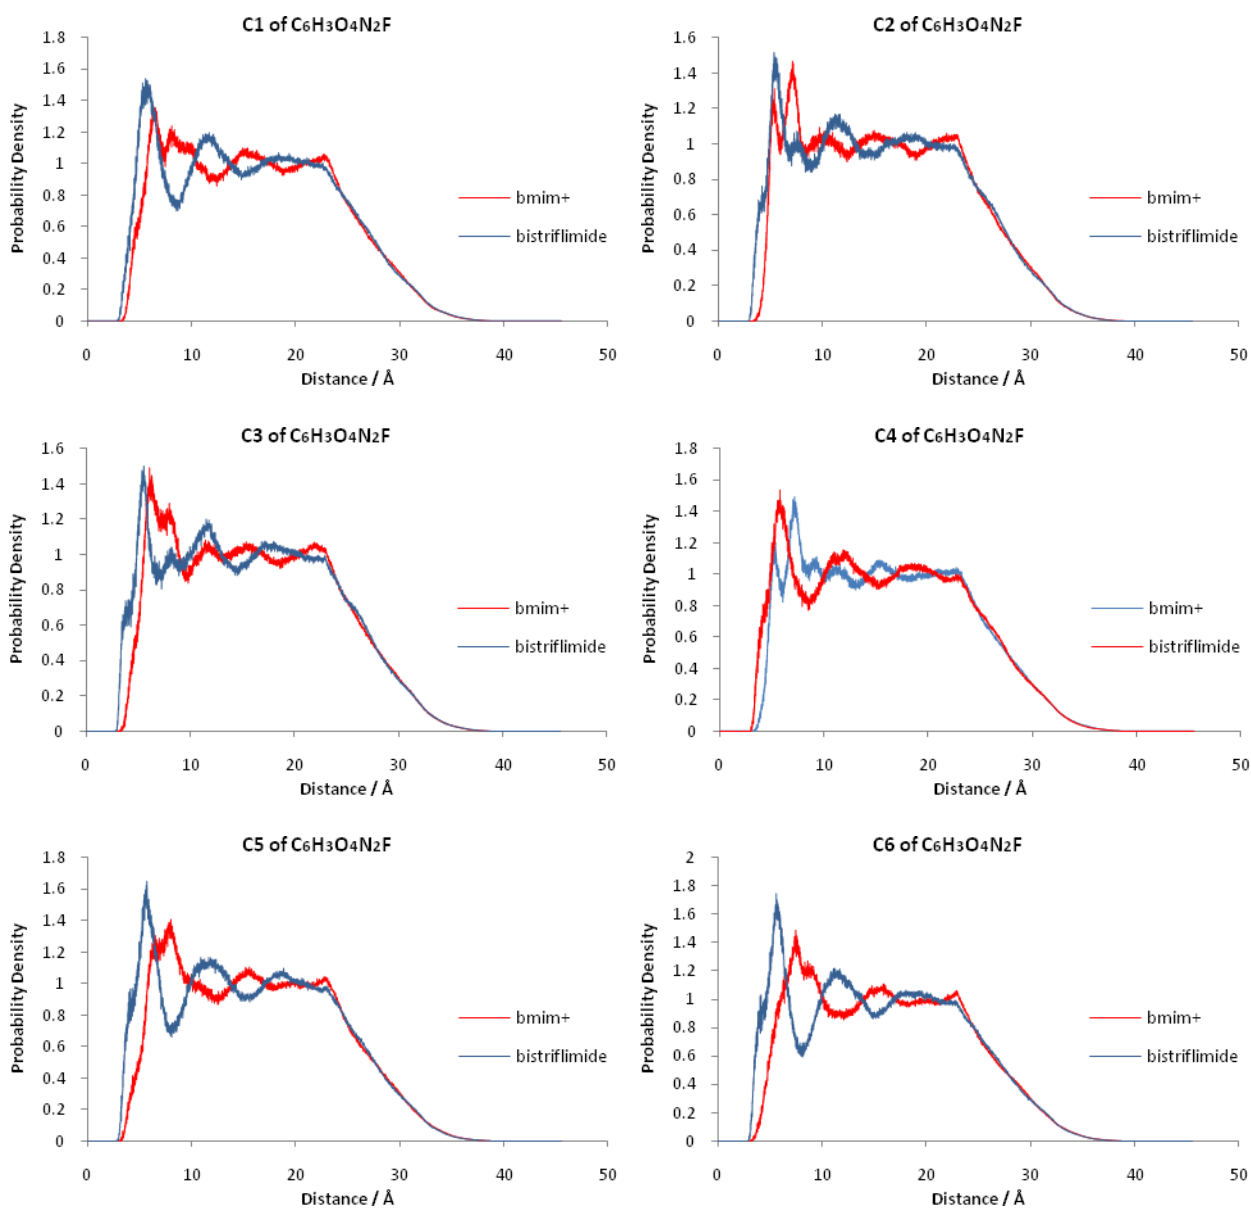

Radial distribution functions showing the degree of ordering of the components of the ionic liquid around the ring carbon of the fluoride starting material. The distribution functions were generated by counting the probability of the corresponding ion over 4 ns.

**Selected radial distribution functions for 1-fluoro-2,4-dinitrobenzene – ethanol adduct in the ionic liquid 1-butyl-3-methylimidazolium bis(trifluoromethanesulfonyl)amide**

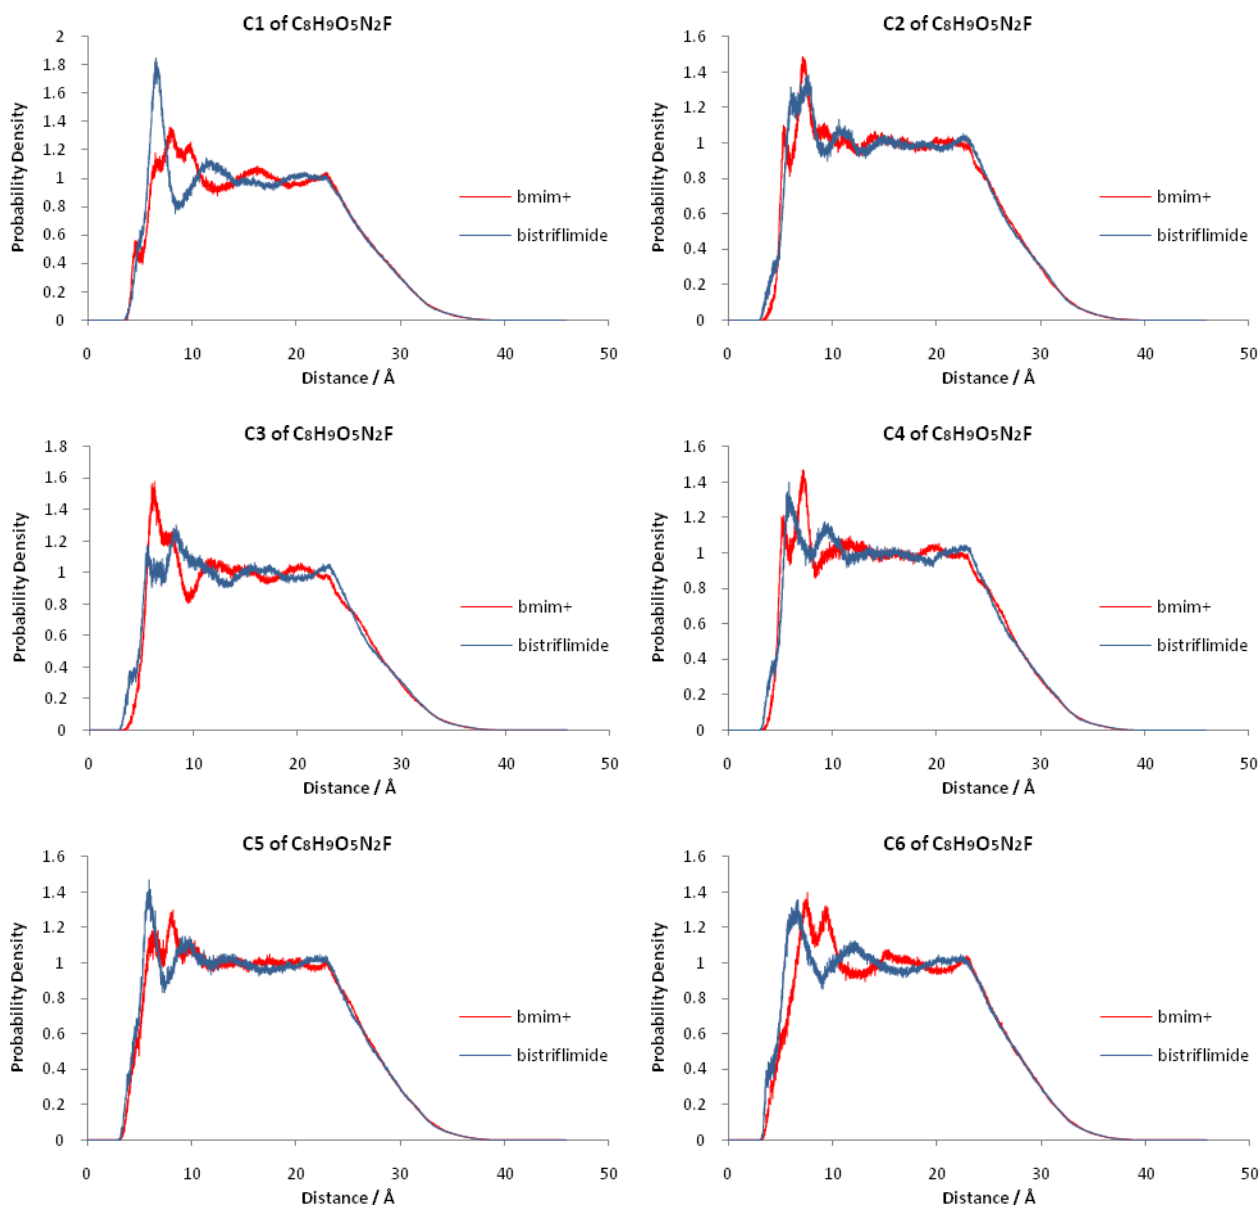

Radial distribution functions showing the organisation of the components of the ionic liquid around the intermediate. The distribution functions were generated by counting the probability of corresponding ion over 4 ns. It is worth noting that on average components of the ionic liquids are further away from the intermediate than the starting material, and particularly so for the imidazolium cation, which suggests that the ionic liquid is becoming more disordered on going from the starting material to the intermediate.

Note that the interaction with other parts of the starting material and with the intermediate have also been considered. However, in all cases the distances for the first maxima are similar and fluctuate without bias for either the starting the material or the intermediate, indicating that the interactions are likely to be hydrogen-bonding limited. The probability densities are also generally higher for the starting material than the corresponding densities for the intermediate.

**Typical radial distribution functions for 1-fluoro-2,4-dinitrobenzene or 1-fluoro-2,4-dinitrobenzene adduct in ethanol**

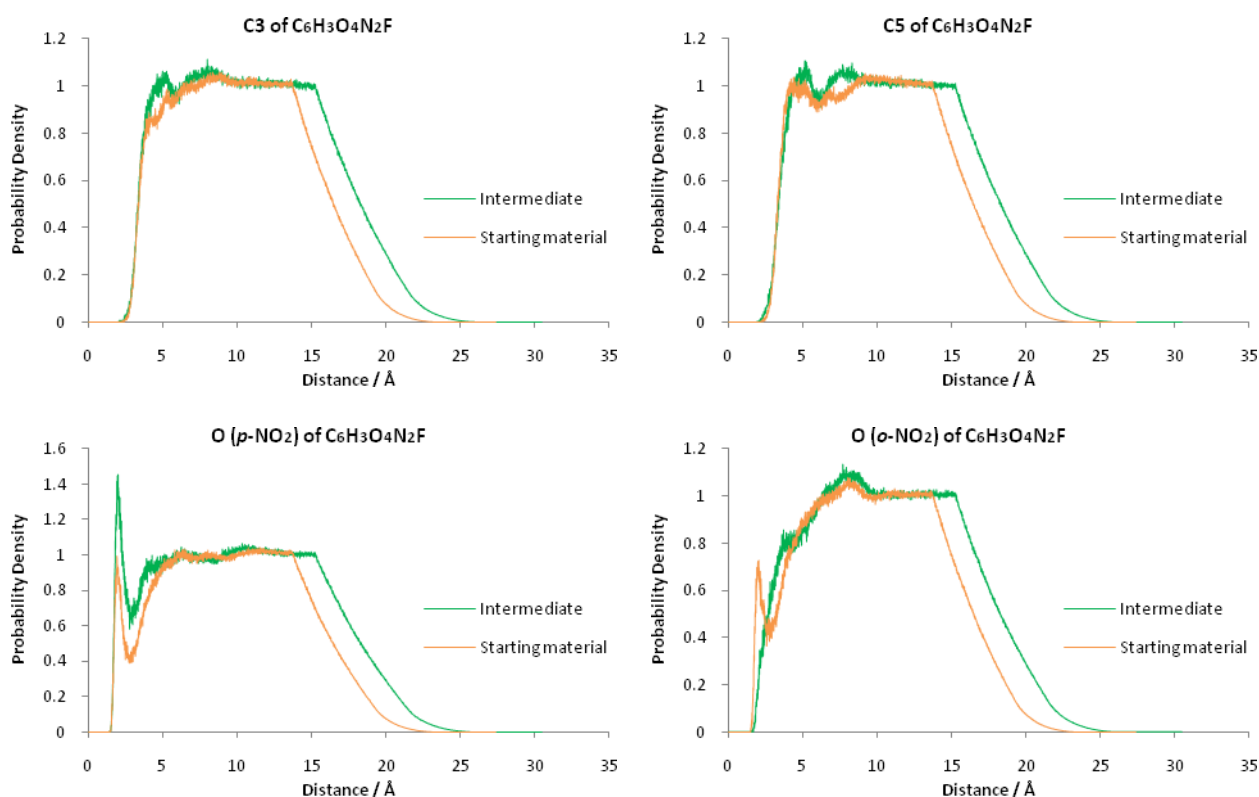

There is no significant change in ordering of ethanol around the ring carbon of both the starting material and the intermediate as indicated by the radial distribution function. Also shown in the plots above is the effect of hydrogen bonding around the *p*-NO<sub>2</sub> and *o*-NO<sub>2</sub> functional groups. Of particular interest is that the radial distribution function for the oxygen of the *o*-NO<sub>2</sub> in the intermediate indicates diminished hydrogen bonding, which is most likely due to the intramolecular hydrogen bonding between the *o*-NO<sub>2</sub> functional group and the hydrogen of the part of the molecule relating to the ethanol nucleophile.

**Distance and probability densities of the first local maxima of the radial distribution functions shown above**

|           | Distance (Å)                   |                   |                                |                   | Probability Density            |                   |                                |                   |
|-----------|--------------------------------|-------------------|--------------------------------|-------------------|--------------------------------|-------------------|--------------------------------|-------------------|
|           | Starting material              |                   | Intermediate                   |                   | Starting material              |                   | Intermediate                   |                   |
|           | Tf <sub>2</sub> N <sup>-</sup> | bmim <sup>+</sup> |
| <b>C1</b> | 5.565                          | 6.385             | 6.535                          | 6.465             | 1.315                          | 1.517             | 1.854                          | 1.179             |
| <b>C2</b> | 5.375                          | 5.345             | 5.985                          | 5.295             | 1.538                          | 1.347             | 1.316                          | 1.099             |
| <b>C3</b> | 5.515                          | 6.065             | 5.555                          | 5.995             | 1.750                          | 1.492             | 1.174                          | 1.563             |
| <b>C4</b> | 5.775                          | 5.355             | 5.825                          | 5.325             | 1.651                          | 1.302             | 1.403                          | 1.212             |
| <b>C5</b> | 5.695                          | 6.505             | 5.895                          | 6.425             | 1.530                          | 1.203             | 1.472                          | 1.186             |
| <b>C6</b> | 5.585                          | 7.455             | 6.555                          | 7.565             | 1.500                          | 1.490             | 1.354                          | 1.400             |



---

|                |       |       |       |       |       |       |       |       |
|----------------|-------|-------|-------|-------|-------|-------|-------|-------|
| <b>Average</b> | 5.585 | 6.185 | 6.058 | 6.178 | 1.547 | 1.392 | 1.429 | 1.273 |
|----------------|-------|-------|-------|-------|-------|-------|-------|-------|

---

The data in the table above shows that, on average, cationic shell maintains roughly the same distance on going from the starting material to the intermediate; whereas the anion shell ‘expands’. Together with the probability density, the data suggests that there is more ordering of the ionic liquid around the starting material than the intermediate.
